# Supplementary material
Source: Springer Nature journal article supplement (https://www.springermedizin.de/resource/supplementary/13012_2013_844_MOESM1_ESM.pdf/9630578)
Supplement: MOESM1 [file 9630578]

## **Additional file 1: Search strategy (September 16, 2013)**

### **MEDLINE (PubMed)**

|     |                                         |             |
|-----|-----------------------------------------|-------------|
| #1  | Clinical Practice Guideline*[tw]        | 6887        |
| #2  | Clinical guideline*[tiab]               | 6397        |
| #3  | Guideline*[ti]                          | 47004       |
| #4  | (#1 OR #2) OR #3                        | 53798       |
| #5  | Methodolog* [tiab]                      | 206771      |
| #6  | Handbook* [tiab]                        | 1902        |
| #7  | #5 OR #6                                | 208439      |
| #8  | ((#4) AND #7)                           | 1935        |
| #9  | Practice Guideline[pt] OR Guideline[pt] | 24053       |
| #10 | (#8) NOT #9                             | <b>1601</b> |
